# Supplementary material
Source: PubMed Central journal article supplement (PMC2018665)

Supplemental Figure 1

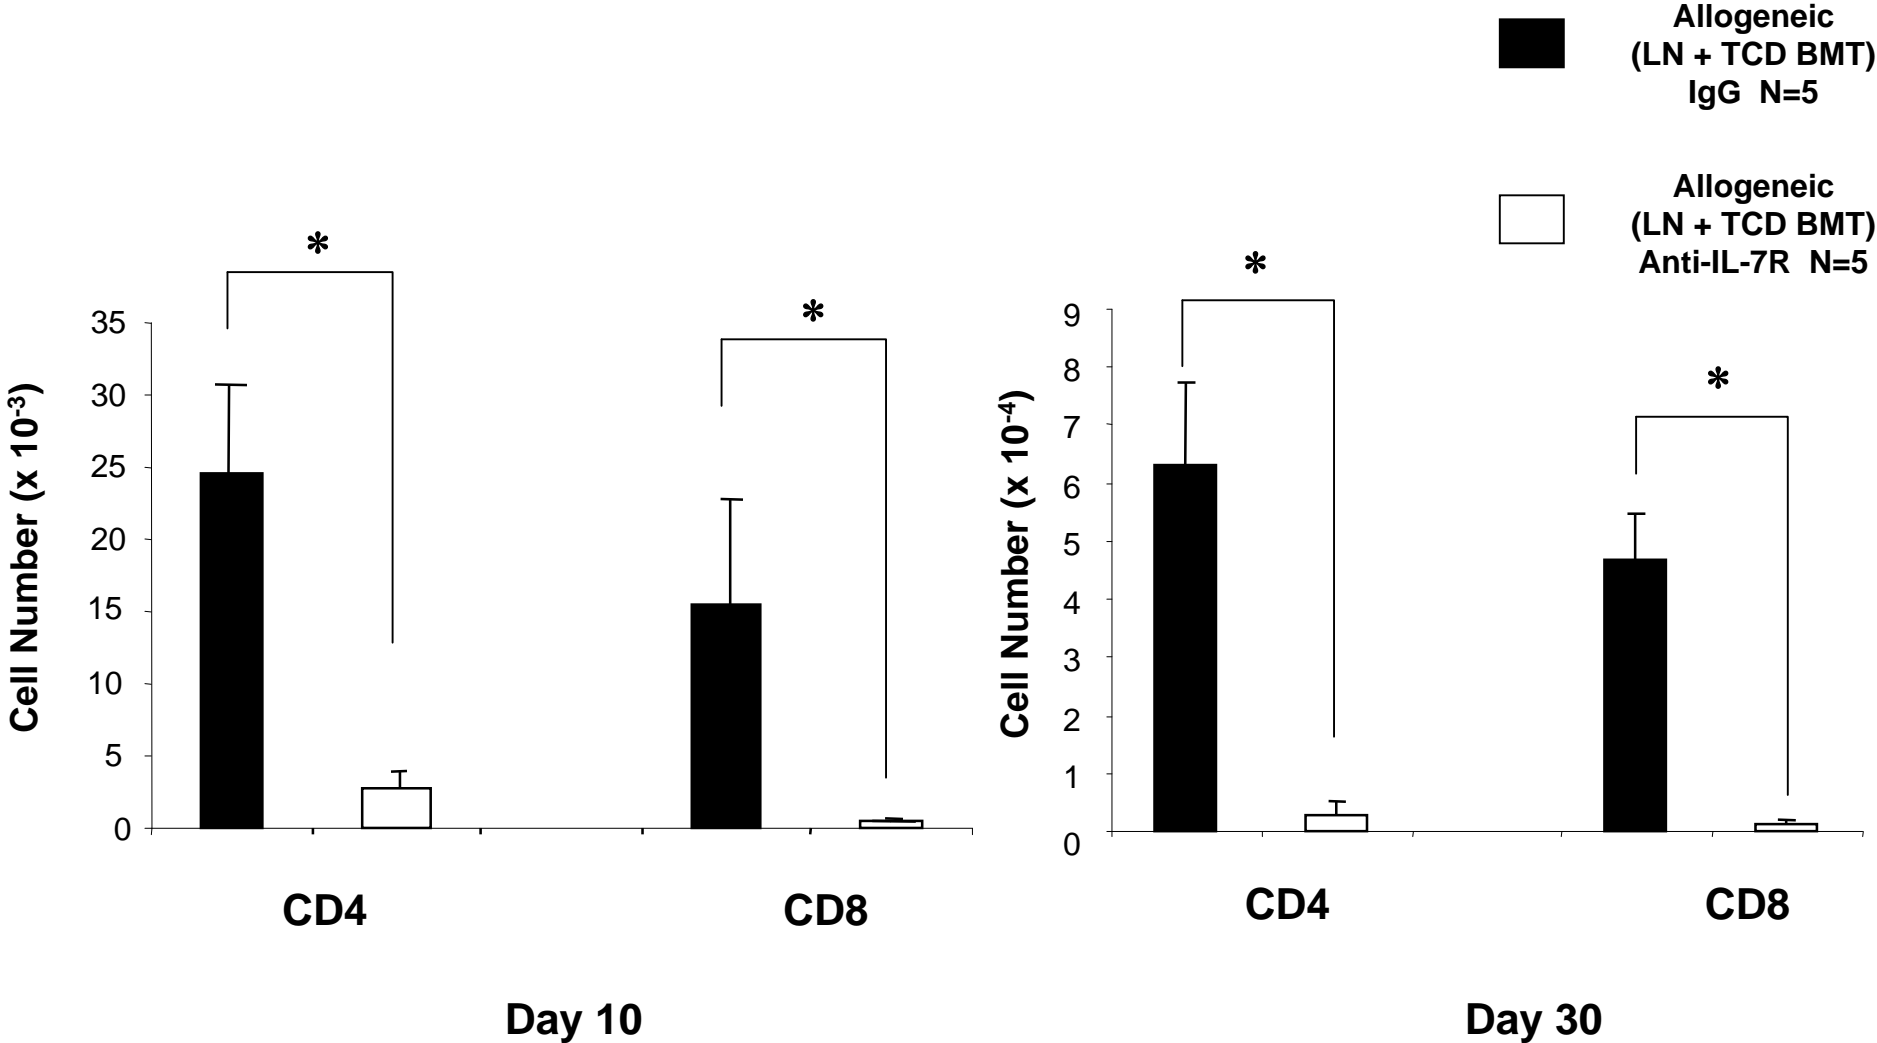

Supplement: blood_blood-2006-11-055673_1.pdf [file blood_blood-2006-11-055673_1.pdf]

Supplemental Figure 2

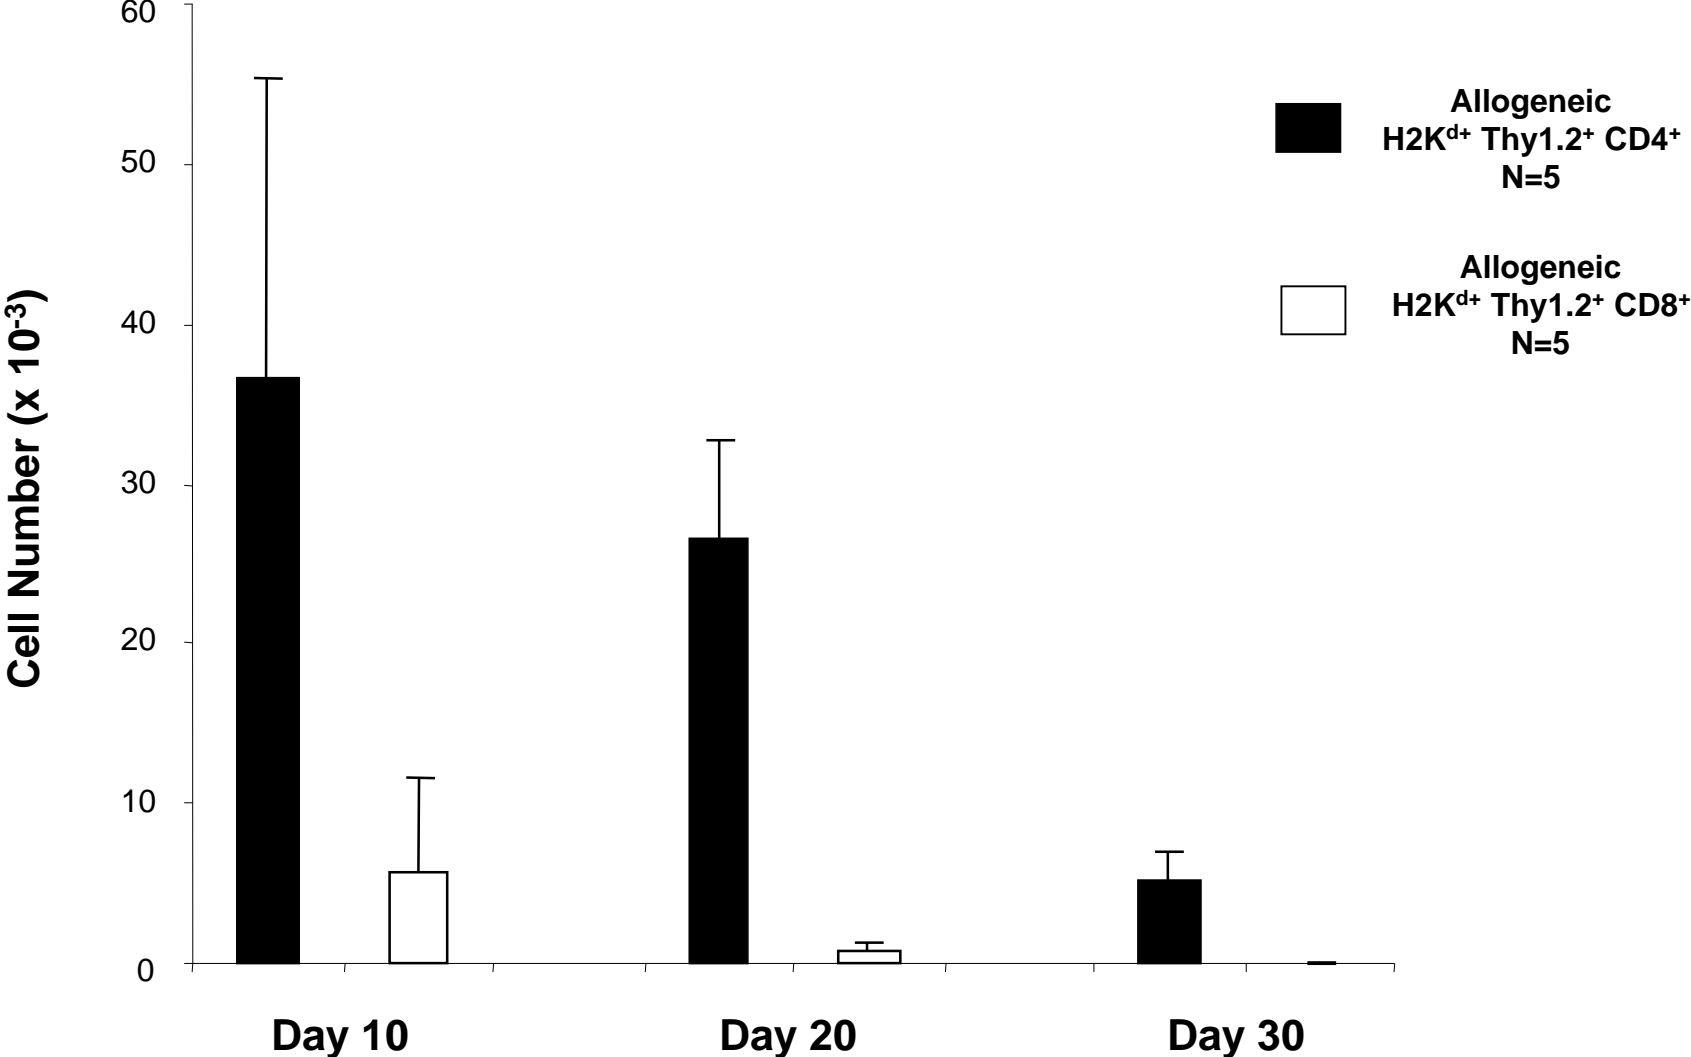

Supplement: blood_blood-2006-11-055673_2.pdf [file blood_blood-2006-11-055673_2.pdf]

Supplemental Figure 3

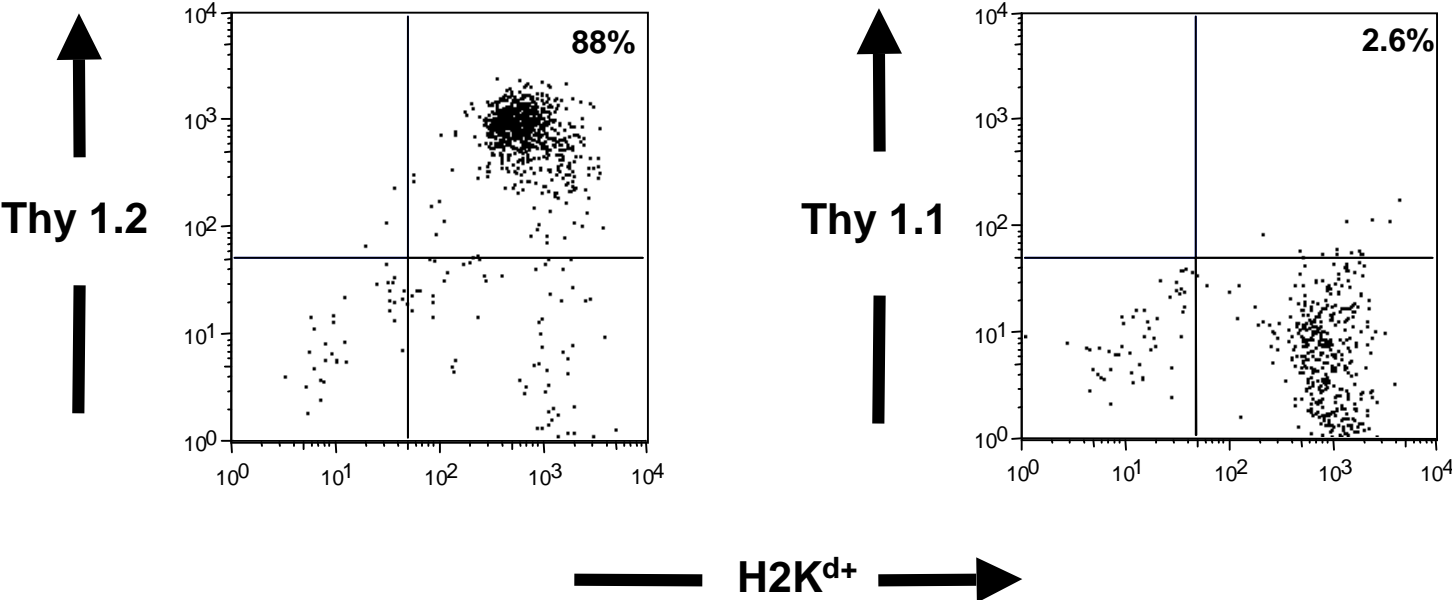

Supplement: blood_blood-2006-11-055673_3.pdf [file blood_blood-2006-11-055673_3.pdf]

**Supplemental Figure 4**

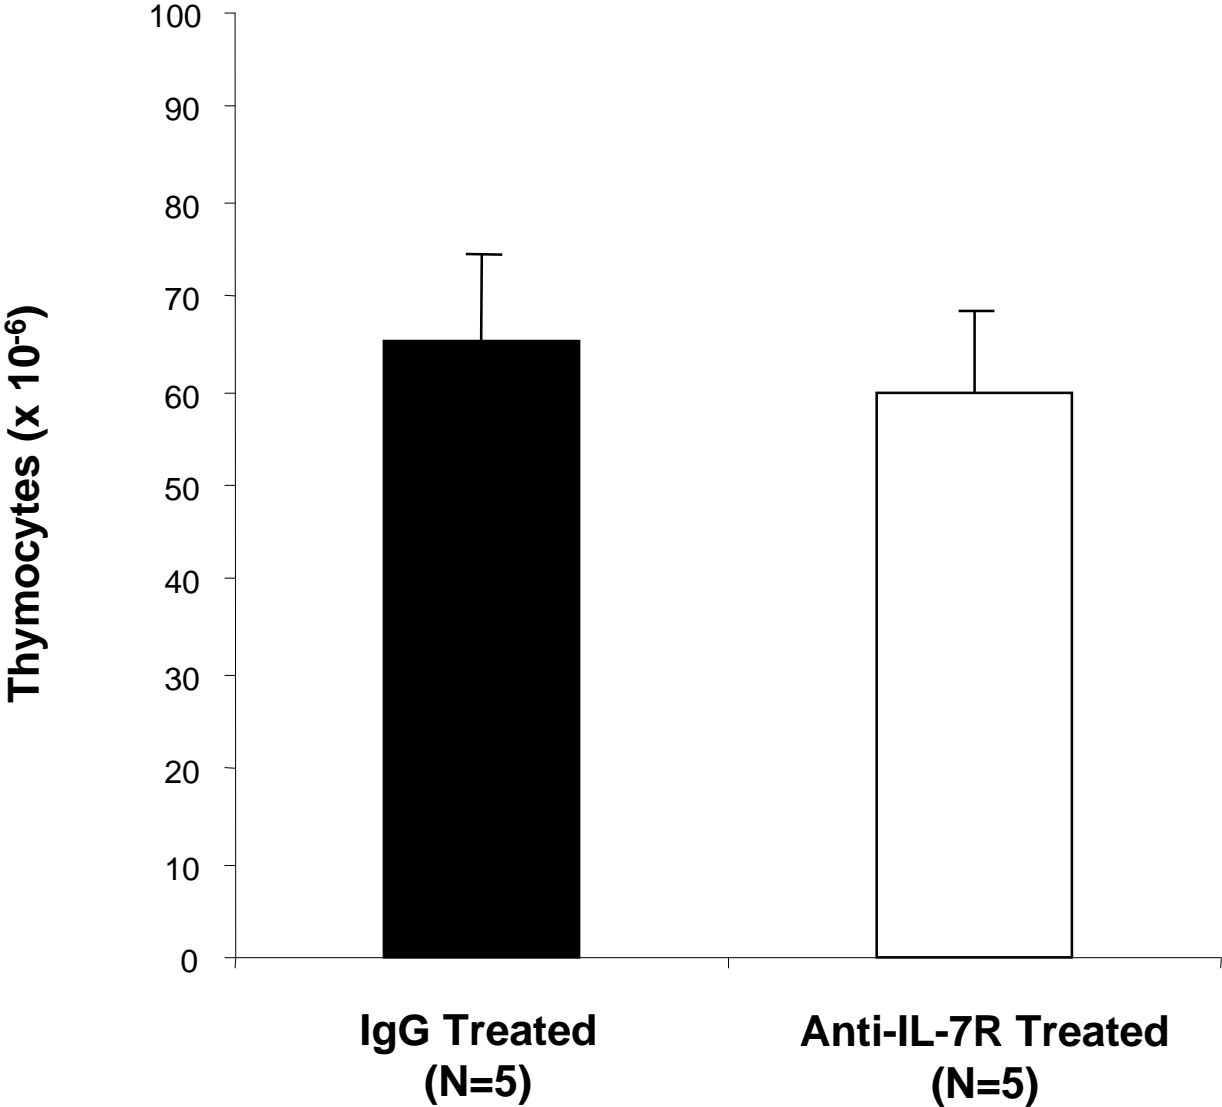

Supplement: blood_blood-2006-11-055673_4.pdf [file blood_blood-2006-11-055673_4.pdf]

# Supplemental Figure 5

A

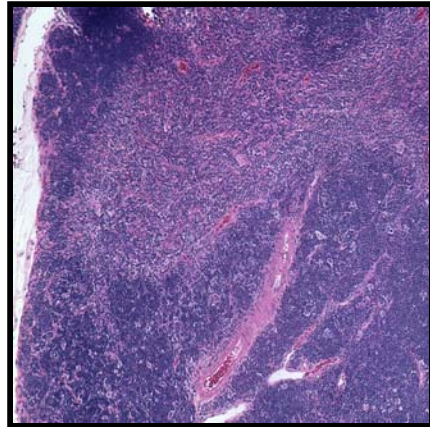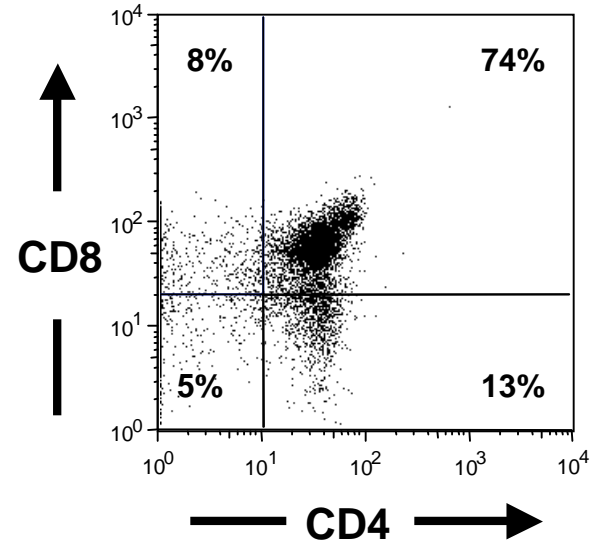

**B**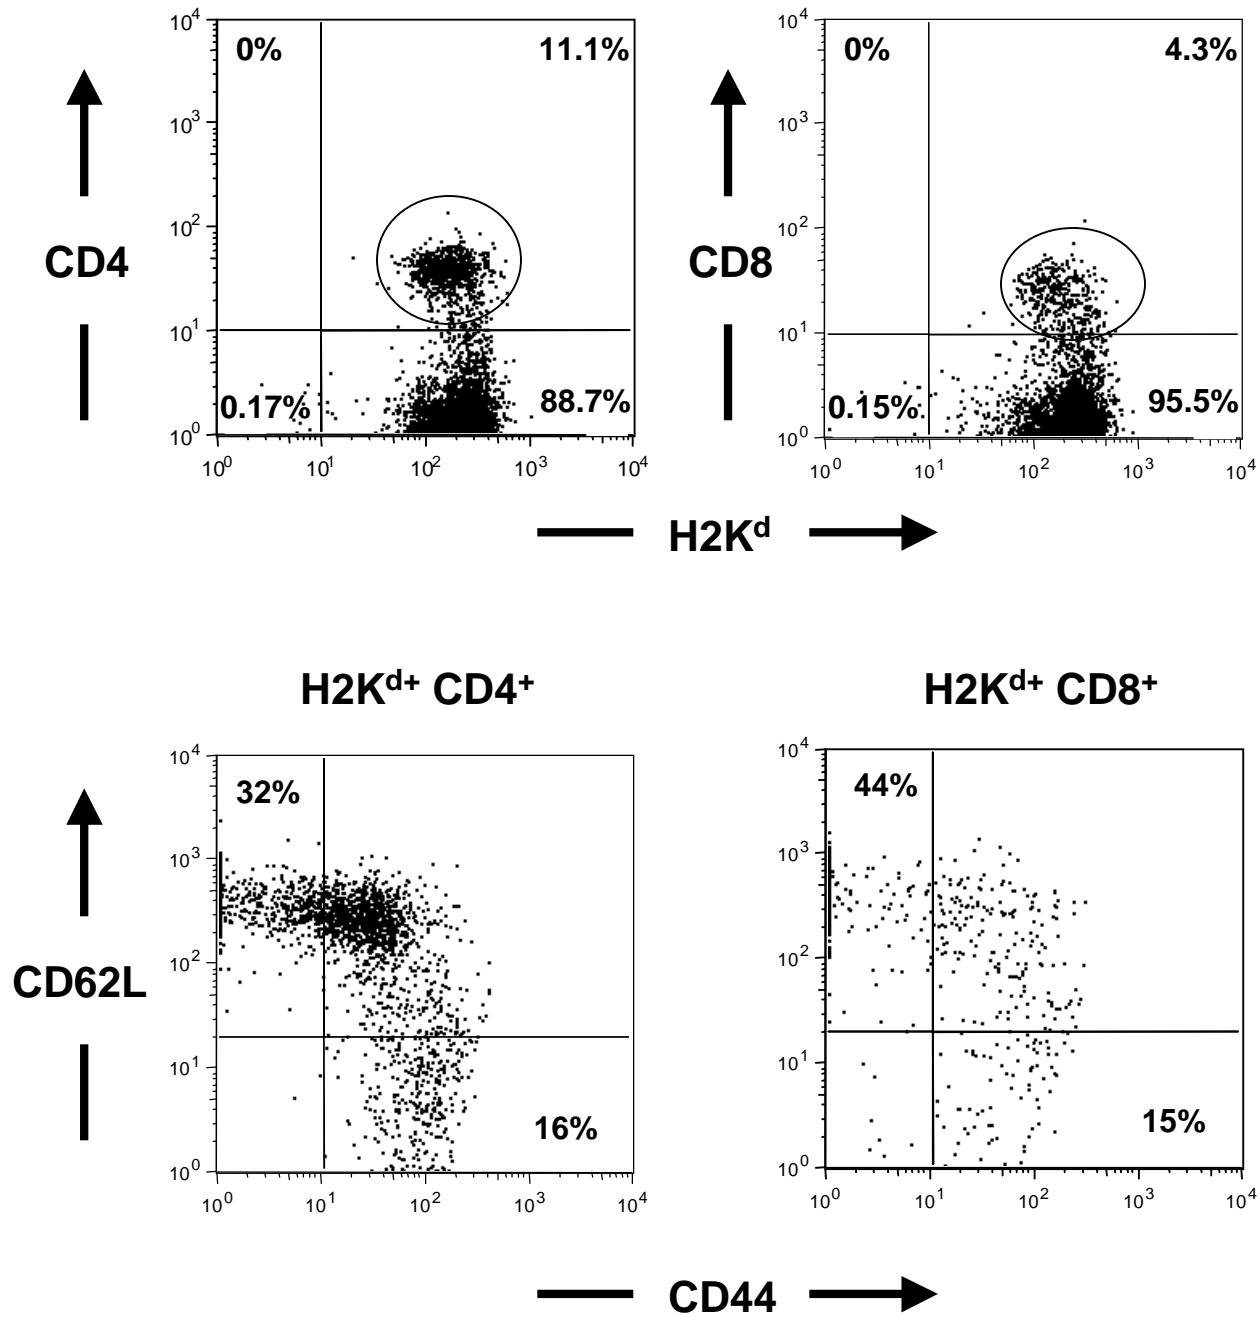

Supplement: blood_blood-2006-11-055673_5.pdf [file blood_blood-2006-11-055673_5.pdf]
